# Supplementary material for: The use of BokaFlo™ instrument to measure salivary flow
Source: PubMed Central journal article supplement (PMC8042968; doi:10.1186/s12903-021-01477-4), 2021-04-12
Supplement: 12903_2021_1477_MOESM1_ESM.pdf [file 12903_2021_1477_MOESM1_ESM.pdf]

## Supplementary Material

### Participant Survey

#### Pre-Testing Survey

Gender: **Male** **Female**

Age: \_\_\_\_\_

Did you eat, drink, chew gum, brush teeth or suck on candies in the past 15 minutes? **Yes / No**

Do you currently take any prescription medication? **Yes / No**

How many hours since you last ate food? **Less than 1 hour** **1** **2** **3** **4+ hours**

Do you think you have dry mouth? **Yes / No**

Have you ever been diagnosed by a dentist or doctor with Dry Mouth? **Yes / No**

Do you think you have healthy saliva flow – **Yes / No / I don't know**

Please note the frequency of the following statements:

|                                                     | <b>Not at all</b>        | <b>A little</b>          | <b>Quite a bit</b>       | <b>Very Much</b>         |
|-----------------------------------------------------|--------------------------|--------------------------|--------------------------|--------------------------|
| <b>My mouth feels dry</b>                           | <input type="checkbox"/> | <input type="checkbox"/> | <input type="checkbox"/> | <input type="checkbox"/> |
| <b>My mouth feels dry when eating</b>               | <input type="checkbox"/> | <input type="checkbox"/> | <input type="checkbox"/> | <input type="checkbox"/> |
| <b>I have difficulty in eating dry food</b>         | <input type="checkbox"/> | <input type="checkbox"/> | <input type="checkbox"/> | <input type="checkbox"/> |
| <b>I have difficulties swallowing certain foods</b> | <input type="checkbox"/> | <input type="checkbox"/> | <input type="checkbox"/> | <input type="checkbox"/> |
| <b>I sip liquids to aid in swallowing food</b>      | <input type="checkbox"/> | <input type="checkbox"/> | <input type="checkbox"/> | <input type="checkbox"/> |
| <b>I have difficulty talking due to dry mouth</b>   | <input type="checkbox"/> | <input type="checkbox"/> | <input type="checkbox"/> | <input type="checkbox"/> |
| <b>I drink more during the day due to dry mouth</b> | <input type="checkbox"/> | <input type="checkbox"/> | <input type="checkbox"/> | <input type="checkbox"/> |
| <b>I have difficulty sleeping due to dry mouth</b>  | <input type="checkbox"/> | <input type="checkbox"/> | <input type="checkbox"/> | <input type="checkbox"/> |
| <b>My lips feel dry</b>                             | <input type="checkbox"/> | <input type="checkbox"/> | <input type="checkbox"/> | <input type="checkbox"/> |

Using the same scale, have had any of the following issues **during the last 12 months:**

|                          | <b>Not at all</b>        | <b>A little</b>          | <b>Quite a bit</b>       | <b>Very Much</b>         |
|--------------------------|--------------------------|--------------------------|--------------------------|--------------------------|
| <b>Bleeding gums</b>     | <input type="checkbox"/> | <input type="checkbox"/> | <input type="checkbox"/> | <input type="checkbox"/> |
| <b>Cavities</b>          | <input type="checkbox"/> | <input type="checkbox"/> | <input type="checkbox"/> | <input type="checkbox"/> |
| <b>Bad breath</b>        | <input type="checkbox"/> | <input type="checkbox"/> | <input type="checkbox"/> | <input type="checkbox"/> |
| <b>Frequent cough</b>    | <input type="checkbox"/> | <input type="checkbox"/> | <input type="checkbox"/> | <input type="checkbox"/> |
| <b>Frequent colds</b>    | <input type="checkbox"/> | <input type="checkbox"/> | <input type="checkbox"/> | <input type="checkbox"/> |
| <b>Tooth sensitivity</b> | <input type="checkbox"/> | <input type="checkbox"/> | <input type="checkbox"/> | <input type="checkbox"/> |
